# A Special Thanks to the Reviewers of *Diabetes Care*

*Diabetes Care* calls on thousands of scientific and medical experts each year to review manuscript submissions. The editors of *Diabetes Care* sincerely appreciate the efforts of all our reviewers who volunteer their time and expertise to provide valuable feedback to ensure the consistently high quality of the research published in each issue. The names of every reviewer are too numerous to list here, but we would like to recognize the “top” reviewers—based on the number of reviews completed, timeliness, reliability, and quality—for their outstanding contributions and dedication to *Diabetes Care*.

## Top Reviewers in 2019

M. Sue Kirkman, MD

Geremia B. Bolli, MD

Mark Molitch, MD

Bruce A. Perkins, MD, MPH

Jessica L. Harding, BBiomedSci, PhD

John Buse, MD, PhD

Joseph I. Wolfsdorf, M.B., B.Ch.

Kathleen M. Dungan, MD, MPH

Richard David Leslie, MD, FRCP, FAoP

Jonathan E. Shaw, MD, FRACP, FRCP (UK), FAAHMS

Thank you,

Matthew C. Riddle, MD

Editor in Chief, *Diabetes Care*
